# Supplementary material for: Preferential orientations of structure directing agents in zeolites
Source: Royal Society of Chemistry journal article supplement (doi:10.1039/c5dt02558c), 2015-01-01

Electronic Supporting Information

## **Preferential orientations of structure directing agents in zeolites**

Eddy Dib, Antoine Gimenez, Tzonka Mineva and Bruno Alonso\*

Institut Charles Gerhardt Montpellier -UMR 5253 CNRS/UM/ENSCM, 8 rue de l'Ecole Normale, 34296 Montpellier  
Cedex 5, France.

### **ESI content:**

1. Synthesis and characterisation of the asymmetric SDA
2. Synthesis of zeolites
3. TGA and elemental analyses
4. X-Ray diffraction
5. Scanning Electron Microscopy
6. Supplementary solid-state NMR conditions and results
7. Extension to 2-hydroxyethyl-tripropylammonium bromide (EtOHTPABr)

## 1. Synthesis and characterisation of the asymmetric SDA

The alkyltripropylammonium halides  $\text{RN}(\text{C}_3\text{H}_7)_3^+\text{Br}^-$  ( $\text{R} \equiv \text{Et, Bu, EtOH}$ ) were prepared by reacting the corresponding alkyl halide with tripropylamine. As an example, ethyltripropylammonium bromide was prepared by refluxing 0.1 mole of tripropylamine and 0.1 mole of ethylbromide in acetonitrile for 24 hours. Then, the solution was cooled and the solvent was removed by rotary evaporation at reduced pressure. The recovered solids were recrystallised in ethyl acetate, and further characterised using solution-state  $^1\text{H}$  and  $^{13}\text{C}$  NMR (*vide infra*).

# tripropylethylammonium bromide (TPEABr) in  $\text{CDCl}_3$

| Chain Position                             | $\alpha$ | Propyl  |          | Ethyl    |         |
|--------------------------------------------|----------|---------|----------|----------|---------|
|                                            |          | $\beta$ | $\gamma$ | $\alpha$ | $\beta$ |
| $^1\text{H } \delta_{\text{iso}}$ (ppm)    | 3.3      | 1.8     | 1.1      | 3.3      | 1.4     |
| $^{13}\text{C } \delta_{\text{iso}}$ (ppm) | 60.2     | 15.9    | 10.9     | 54.8     | 8.2     |

# butyltripropylammonium bromide (BTABr) in  $\text{CDCl}_3$

| Chain Position                             | $\alpha$ | Propyl  |          | Butyl    |         |          |          |
|--------------------------------------------|----------|---------|----------|----------|---------|----------|----------|
|                                            |          | $\beta$ | $\gamma$ | $\alpha$ | $\beta$ | $\gamma$ | $\delta$ |
| $^1\text{H } \delta_{\text{iso}}$ (ppm)    | 3.2      | 1.8     | 0.9      | 3.2      | 1.7     | 1.3      | 0.9      |
| $^{13}\text{C } \delta_{\text{iso}}$ (ppm) | 60.8     | 16.0    | 10.9     | 59.1     | 24.2    | 19.8     | 13.7     |

# 2-hydroxy-ethyl-tripropylammonium (EtOHTPABr) in  $\text{CDCl}_3$

| Chain Position                             | $\alpha$ | Propyl  |          | EtOH     |         | OH  |
|--------------------------------------------|----------|---------|----------|----------|---------|-----|
|                                            |          | $\beta$ | $\gamma$ | $\alpha$ | $\beta$ |     |
| $^1\text{H } \delta_{\text{iso}}$ (ppm)    | 3.4      | 1.8     | 1.0      | 3.4      | 3.6     | 4.1 |
| $^{13}\text{C } \delta_{\text{iso}}$ (ppm) | 55.5     | 15.8    | 10.8     | 60.7     | 61.2    | --- |

# tetrapropylammonium bromide (TPABr) in  $\text{CDCl}_3$

| Chain Position                             | $\alpha$ | Propyl  |          |
|--------------------------------------------|----------|---------|----------|
|                                            |          | $\beta$ | $\gamma$ |
| $^1\text{H } \delta_{\text{iso}}$ (ppm)    | 3.3      | 1.8     | 1.1      |
| $^{13}\text{C } \delta_{\text{iso}}$ (ppm) | 60.2     | 15.9    | 10.9     |

## 2. Synthesis of zeolites

The synthesis of zeolites was done by hydrothermal treatment of an aqueous gel. Typically 2.2g of  $\text{NH}_4\text{F}$  were dissolved in 39.6g of water by stirring at ambient temperature in presence of  $8.3 \times 10^{-3}$  mole of the used SDA. After a total dissolution, 4.0 g of fumed silica (Aerosil 200) were added. Then, the mixture was transferred to a 50 mL Teflon coated autoclave and heated at  $175^\circ\text{C}$  during 5 days. The obtained powders were washed abundantly with distilled water and heated at  $80^\circ\text{C}$  overnight. The yields of all the synthesis were similar (75 - 80%). The theoretical formula of the as-synthesised zeolites is  $\text{SiO}_2[\text{R}(\text{Pr})_3\text{NF}]_{1/24}$  (*vide infra*).

## 3. TGA and elemental analyses

The experimental weight losses measured by thermogravimetric analyses (TGA, curves below) are very close to the expected theoretical losses considering a molar ratio  $\text{Si}/\{\text{R}(\text{Pr})_3\text{N}^+\}$  equal to 24 (see Table below). The experimental Si/F molar ratios obtained from elemental analyses are also consistent with an expected Si/F molar ratio of 24.

TGA were performed on a NETZSCH TG 209, under air with a 293-1173 K temperature ramp and a heating rate of  $10 \text{ K}\cdot\text{min}^{-1}$ . Elemental analyses were done at the CNRS facility "Service Central d'Analyse" (Vernaison, France), using Inductive Coupled Plasma (for Si) and ionic chromatography with a specific electrode (for F). See: <http://www.sca.cnrs.fr/> for more details.

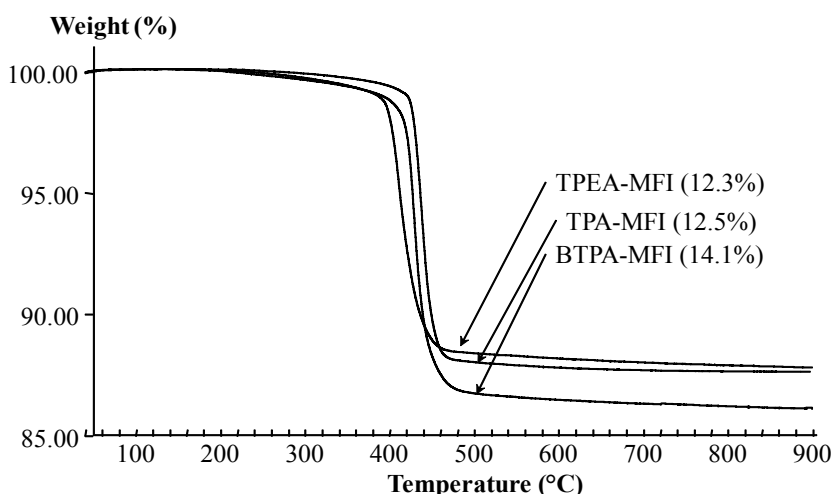

|          | Expected weight loss (%) | Experimental weight loss (%) | Experimental Si/F |
|----------|--------------------------|------------------------------|-------------------|
| TPEA-MFI | 11.7                     | 12.3                         | 28.7              |
| TPA-MFI  | 12.4                     | 12.5                         | 25.3              |
| BTPA-MFI | 13.2                     | 14.1                         | 28.6              |

#### 4. X-Ray diffraction

The X-Ray diffraction (XRD) powder patterns presented below were collected on a Bruker AXS D8 diffractometer using a Cu-K $\alpha$  radiation.

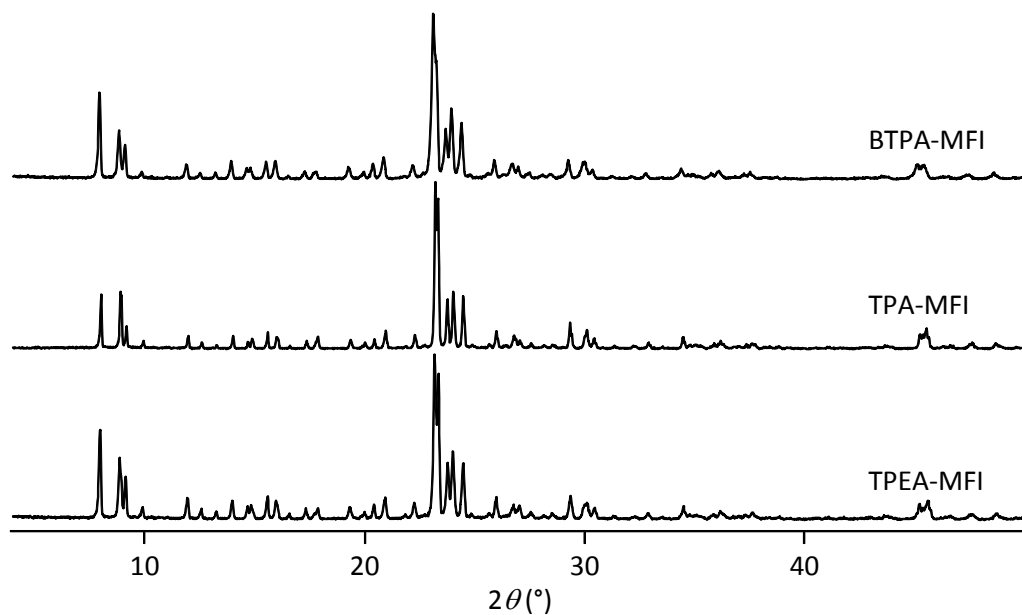

#### 5. Scanning Electron Microscopy

The Scanning Electron Microscopy pictures were recorded using a HITACHI 4800 S microscope and metallised samples.

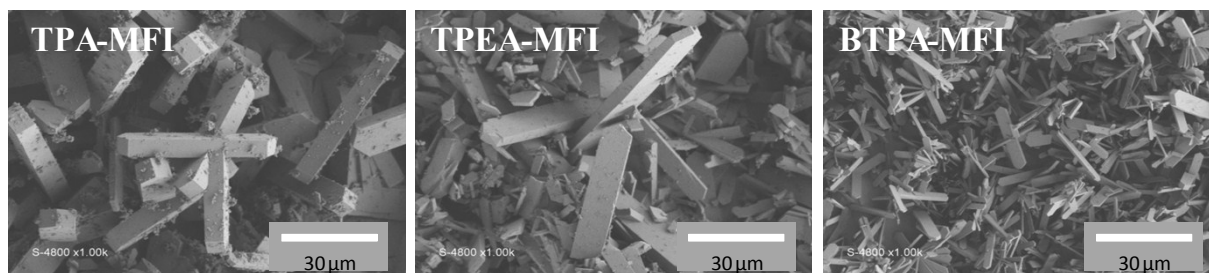

## 6. Solid-state NMR data

### 6.1 Standard experimental conditions

The NMR spectra were recorded using MAS probes (zirconia rotors) on Varian 600 spectrometer (14.1 T) for  $^{19}\text{F}$ ,  $^{14}\text{N}$  and  $^1\text{H}$  nuclei, and on a Varian 300 spectrometer (7.0 T) for  $^{29}\text{Si}$  and  $^{13}\text{C}$  nuclei. Spectrum modelling was achieved using the freely accessible *DmFit* software.<sup>1</sup>

$^1\text{H}$  NMR spectra were recorded using 1.2 mm rotors,  $\pi/2$  pulses of 2.0  $\mu\text{s}$ , and recycling delays of 2 s. Chemical shifts are referenced towards external TMS.

$^{13}\text{C}\{^1\text{H}\}$  NMR cross-polarization (CP) MAS spectra were recorded using 7.5 mm rotors. Experiments were conducted using: contact times of 5 ms, a linear ramp on the  $^1\text{H}$  contact pulse (10 % slope),  $^1\text{H}$  decoupling during acquisition ( $^1\text{H}$  RF field strengths  $\nu_{RF} \sim 50$  kHz), and recycle delay of 5 s. Chemical shifts were referenced towards external neat TMS.

$^{14}\text{N}$  NMR MAS single pulse spectra were recorded using 9.5 mm rotors spun at  $\nu = 2, 3$  and 4 kHz (stability within 1-2 Hz). RF field strengths were  $\nu_{RF} \sim 84$  kHz, flip angles to  $\pi/8$  (3  $\mu\text{s}$ , bandwidth  $\sim 170$  kHz) and recycling delays to 0.5 s. Smaller flip angles were also tested (down to 2  $\mu\text{s}$ , bandwidth  $\sim 250$  kHz). These conditions insure a wide irradiation, and proper longitudinal relaxation. The FID was left shifted so as to consider only the acquired points after the first rotational echo maximum.  $^1\text{H}$  decoupling ( $\nu_{RF} \sim 25$  kHz) was used during acquisition.  $^{14}\text{N}$  NMR chemical shifts were referenced towards solid  $\text{NH}_4\text{Cl}$  spun at 3 kHz.

$^{19}\text{F}$  NMR spectra were recorded using 2.5 mm rotors,  $\pi/2$  pulses of 1.7  $\mu\text{s}$ , and recycling delays of 10 s were used. Chemical shifts are referenced towards external  $\text{CFCl}_3$ .

$^{29}\text{Si}\{^1\text{H}\}$  NMR CP-MAS spectra were recorded using 7.5 mm rotors. Experiments were conducted using: contact times of 15 ms, a linear ramp on the  $^1\text{H}$  contact pulse (10 % slope),  $^1\text{H}$  decoupling during acquisition ( $^1\text{H}$   $\nu_{RF} \sim 50$  kHz), and recycle delay of 2 s. Chemical shifts were referenced towards external neat TMS.

---

<sup>1</sup> D. Massiot, F. Fayon, M. Capron, I. King, S. Le Calve, B. Alonso, J.O. Durand, B. Bujoli, Z. Gan and G. Hoatson, *Magn. Reson. Chem.* 2002, **40**, 70.

## 6.1 $^{29}\text{Si}$ NMR

$^{29}\text{Si}$  isotropic chemical shifts (in ppm) obtained from spectrum deconvolution and assigned following a previous assignment for TPA-MFI.<sup>2</sup>

| <i>T site*</i>                                                                         | <i>TPEA-MFI</i> | <i>TPA-MFI</i> | <i>BTPA-MFI</i> |
|----------------------------------------------------------------------------------------|-----------------|----------------|-----------------|
| ---                                                                                    | -101.1          | -102.2         | -102.2          |
| 10                                                                                     | -107.4          | -108.2         | -108.4          |
| 1                                                                                      | -109.2          | -109.7         | -110.2          |
| 12                                                                                     | -111.4          | -112.2         | -112.5          |
| 7                                                                                      | -111.8          | -112.5         | -112.8          |
| 6                                                                                      | -112.3          | -113.0         | -113.2          |
| 5                                                                                      | -113.1          | -113.2         | -113.5          |
| 2                                                                                      | -114.4          | -114.9         | -113.9          |
| 3                                                                                      | -114.9          | -115.3         | -115.5          |
| 11                                                                                     | -116.3          | -115.8         | -116.1          |
| 8                                                                                      | -117.1          | -116.9         | -116.9          |
| 4                                                                                      | -117.7          | -117.6         | -117.8          |
| 9                                                                                      | -127            | -125           | -127            |
| Average over all sites (1-12)                                                          | -114.4          | -114.5         | -114.8          |
| Average for sites close to F<br>(cage [4 <sup>1</sup> 5 <sup>2</sup> 6 <sup>2</sup> ]) | -114.9          | -115.6         | -116.3          |

<sup>2</sup> C. Fyfe, D. Brouwer, A. Lewis and J.M. Chézeau, *J. Am. Chem. Soc.*, 2001, **123**, 6882.

## 6.2 $^{19}\text{F}$ NMR

The  $^{19}\text{F}$  NMR spectra recorded at  $\nu_{MAS} = 20$  kHz are presented below. The main peak located at  $\sim -63$  ppm represents the fluoride in the  $[4^15^26^2]$  cage while the minor peaks (less than 3-8 %) observed at around  $-80$  ppm and  $-120$  ppm are assigned to structure defect (following the proposition of ref. 3) and residual  $\text{NH}_4\text{F}$  respectively.

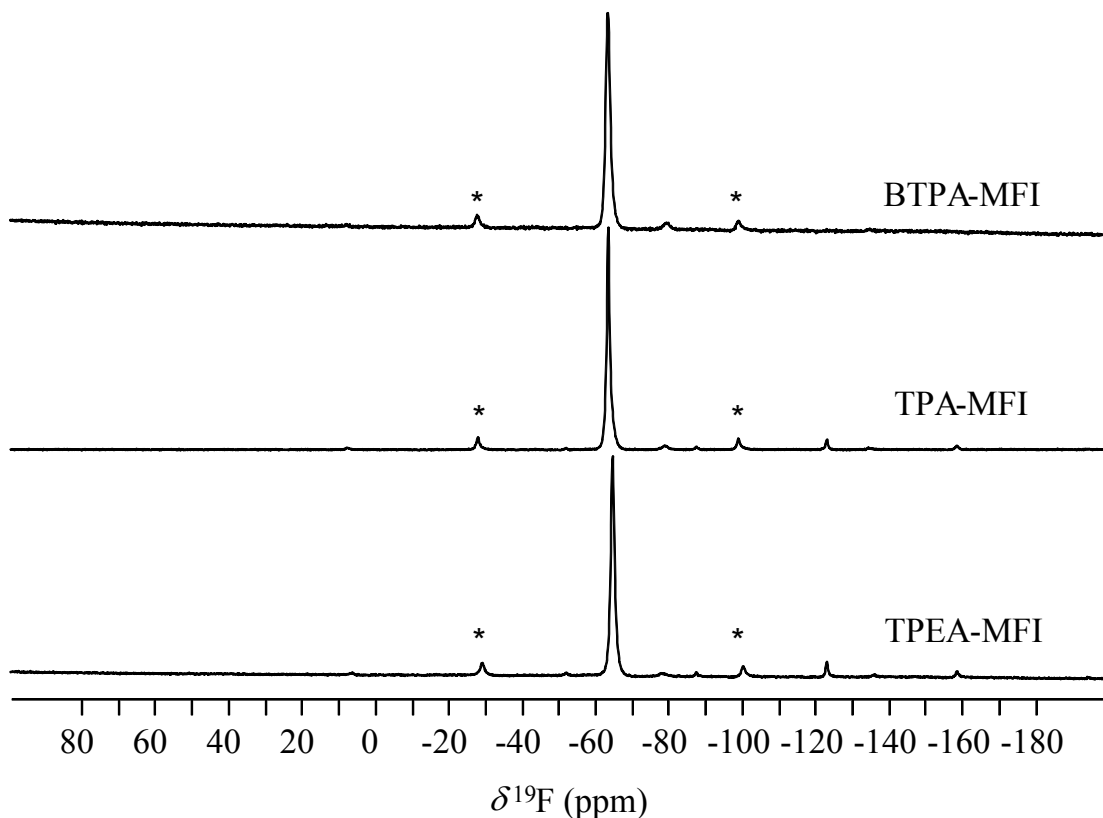

The table below presents the  $^{19}\text{F}$  chemical shift anisotropy parameters extracted from spectra recorded at  $\nu_{MAS} = 5$  and 20 kHz.

| <i>Sample</i>   | $\delta_{\text{iso}}$ (ppm) | $\Delta_{\text{CSA}}$ (ppm) | $\eta_{\text{CSA}}$ |
|-----------------|-----------------------------|-----------------------------|---------------------|
| <b>BTPA-MFI</b> | -62.6 (5 kHz)               | -27                         | 0.8                 |
|                 | -63.0 (20 kHz)              |                             |                     |
| <b>TPA-MFI</b>  | -62.8 (5 kHz)               | -25                         | 0.9                 |
|                 | -63.4 (20 kHz)              |                             |                     |
| <b>TPEA-MFI</b> | -63.9 (5 kHz)               | -28                         | 0.9                 |
|                 | -64.6 (20 kHz)              |                             |                     |

<sup>3</sup> L. Delmotte, M. Soulard, F. Guth, A. Seive, A. Lopez and J.L. Guth, *Zeolites*, 1990, **10**, 778.

## 6.3 $^1\text{H}$ NMR

### 6.3.1 $^1\text{H}$ single pulse spectra for the as-synthesised zeolites ( $\nu_{MAS} = 50$ kHz).

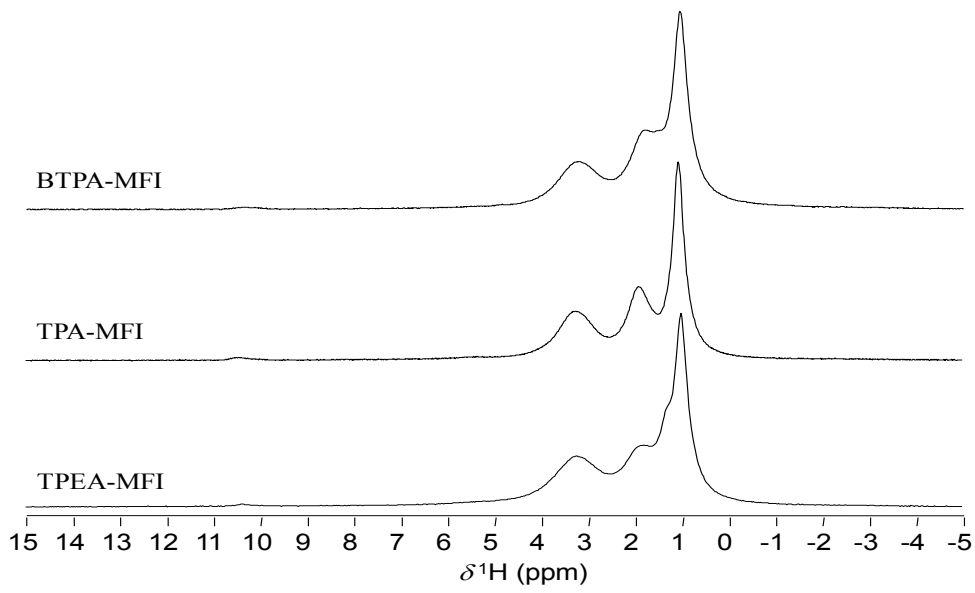

### 6.3.2 $^1\text{H}$ single pulse spectra recorded at variable $\nu_{MAS}$ (sample BTPA-MFI).

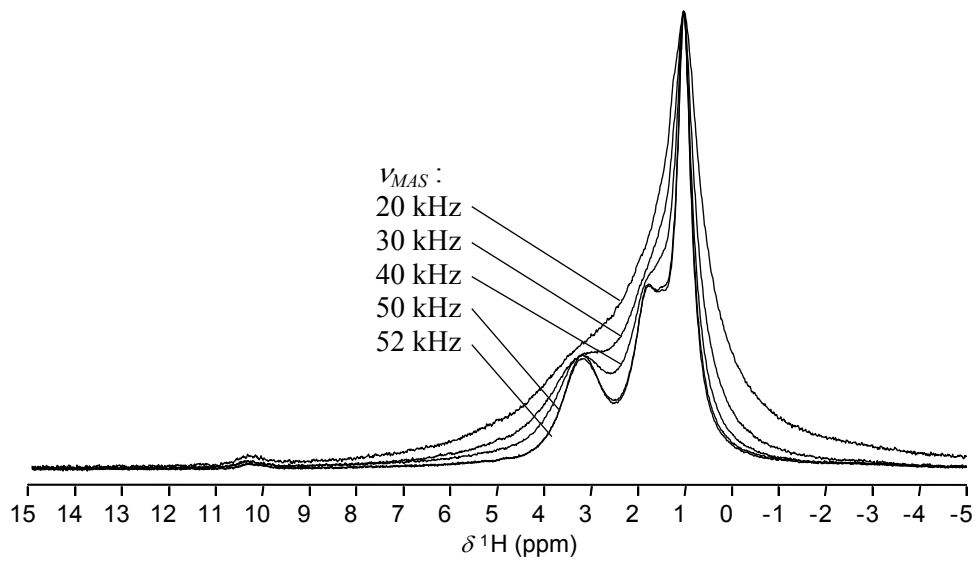



### 6.3.3 <sup>1</sup>H NMR Table for the as-synthesised zeolites.

| <b>H position<br/>in alkyl chains</b>     | <b><sup>1</sup>H isotropic chemical shift <math>\delta_{iso}</math> (ppm)</b> |                |                 |
|-------------------------------------------|-------------------------------------------------------------------------------|----------------|-----------------|
|                                           | <b>BTPA-MFI</b>                                                               | <b>TPA-MFI</b> | <b>TPEA-MFI</b> |
| C-CH <sub>3</sub> (Bu, Pr)                | 1.0                                                                           | 1.1            | 1.0             |
| C-CH <sub>3</sub> (Et)                    | -                                                                             | -              | 1.4             |
| C-CH <sub>2</sub> -C ( $\gamma$ in Bu)    | 1.6                                                                           | -              | -               |
| C-CH <sub>2</sub> -C ( $\beta$ in Bu, Pr) | 1.9                                                                           | 1.9            | 1.9             |
| N-CH <sub>2</sub> -C (Bu, Et, Pr)         | 3.2                                                                           | 3.3            | 3.3             |
| OH defects (< 1 %)                        | 10.3                                                                          | 5.6, 10.4      | 5.6, 10.4       |

### 6.3.4 $^1\text{H}$ - $^1\text{H}$ Double Quantum (DQ) – Single Quantum (SQ) correlations.

$^1\text{H}$ - $^1\text{H}$  DQ-SQ 2D correlation experiments based on homonuclear dipolar couplings were recorded using the BABA scheme<sup>4</sup> and identical excitation and reconversion times ( $\tau_e$  and  $\tau_r$ ). Results presented for  $\tau_e = \tau_r = 40 \mu\text{s}$  were similar to those found for  $\tau_e = \tau_r = 80 \mu\text{s}$ . As no correlations peaks are observed for the small -OH defects, the 2D spectra are centred on the  $^1\text{H}$  signals of the alkyl groups.

The greyed circles correspond to calculated correlation peaks from 1D spectrum deconvolution (see table above), and making the hypothesis that all  $^1\text{H}$  nuclei are coupled together within the same alkyl chain (Et, Pr or Bu) but not between all chains. This hypothesis is enough to explain the experimental 2D data (in particular in the case of TPEA-MFI).

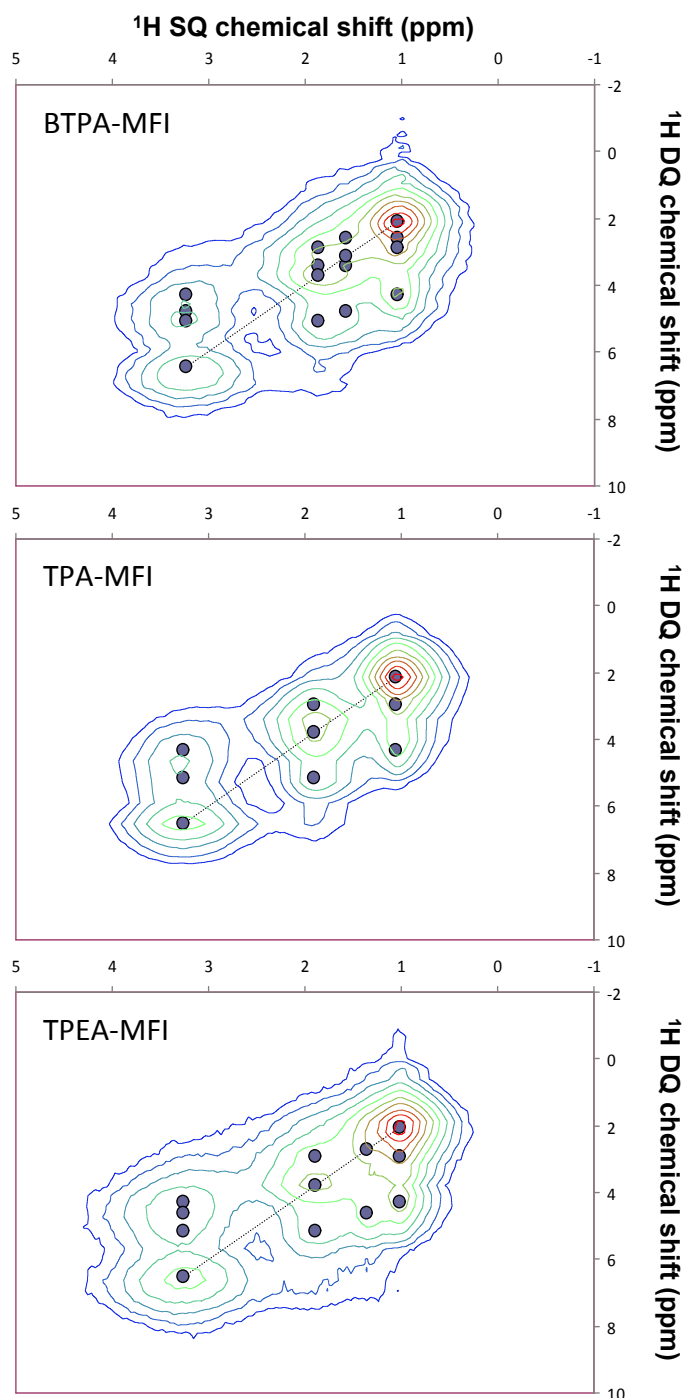

<sup>4</sup> W. Sommer, J. Gottwald, D.E. Demco and H.W. Spiess, *J. Magn. Reson. A*, 1995, **113**, 131.

## 6.4 $^{14}\text{N}$ NMR quadrupolar interaction parameters

### 6.4.1 Zeolites

| <i>Sample</i>      | <i>C<sub>Q</sub> (kHz)</i> | <i>η<sub>Q</sub></i> |
|--------------------|----------------------------|----------------------|
| <b>TPA-MFI</b>     | 53.0                       | 0.3                  |
| <b>TPEA-MFI</b>    | 58.0                       | 0.4                  |
| <b>BTPA-MFI</b>    | 54.0                       | 0.6                  |
| <b>EtOHTPA-MFI</b> | 84.0                       | 0.7                  |

### 6.4.2 Halides

| <i>Crystal</i>   | <i>C<sub>Q</sub> (kHz)</i> | <i>η<sub>Q</sub></i> |
|------------------|----------------------------|----------------------|
| <b>TPABr</b>     | 48.0                       | 0.0                  |
| <b>TPEABr</b>    | 65.0                       | 0.5                  |
| <b>BTPABr</b>    | 71.0                       | 0.7                  |
| <b>EtOHTPABr</b> | 129.0                      | 0.8                  |

7. Extension to 2-hydroxyethyl-tripropylammonium bromide (EtOHTPABr)

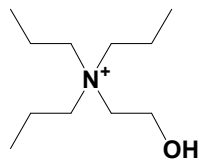

<sup>29</sup>Si {<sup>1</sup>H} NMR CP-MAS: comparison between EtOHTPA-MFI (bottom) and the TPA-MFI (up).

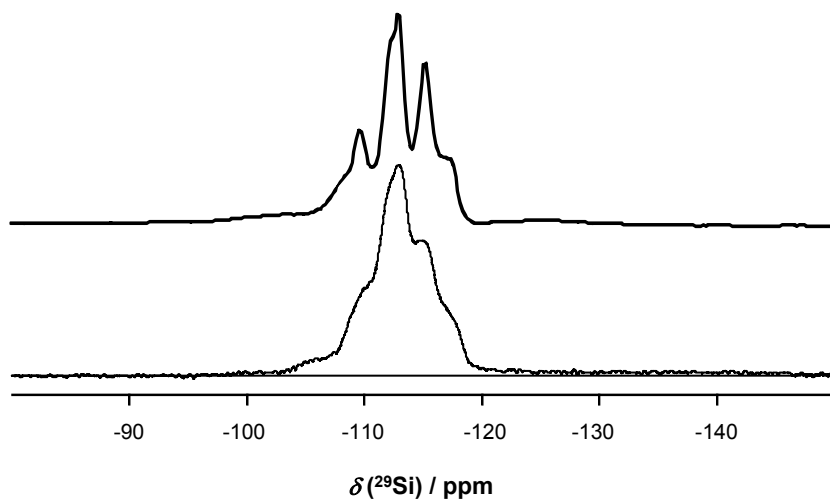

Supplement: c5dt02558c1.pdf [file c5dt02558c1.pdf]
